# Supplementary material
Source: PubMed Central journal article supplement (PMC6751721)
Supplement: ao9b01785_si_001.pdf [file ao9b01785_si_001.pdf]

## Supplementary Information

### Radical Triggered Chemiluminescence of Phenanthroline Derivatives: An Insight into Radical-Aromatic Interaction

Syed Niaz Ali Shah,<sup>a</sup> Aamir Hassan Shah,<sup>b</sup> Xiangnan Dou,<sup>a</sup> Mashooq Khan,<sup>a</sup> Ling Lin,<sup>\*b</sup> Jin-Ming Lin<sup>\*a</sup>

<sup>a</sup> Department of Chemistry, Beijing Key Laboratory of Microanalytical Methods and Instrumentation, Tsinghua University, Beijing 100084, China

<sup>b</sup> The National Center for Nanoscience and Technology (NCNST) of China, No. 11 ZhongGuanCun, 100190 Beijing, P. R. China

\*Corresponding authors: [jmlin@mail.tsinghua.edu.cn](mailto:jmlin@mail.tsinghua.edu.cn) [linling@nanoctr.cn](mailto:linling@nanoctr.cn)

#### Results

Herein, 1,10-phen apparently catalyze the release of energy and direct it toward the formation of excited state. Various intermediate derivatives of 1,10-phen can be formed in the course of these reactions. Many interesting results concerning interconversion of electronic states during reaction can be observed. The reduction of  $\text{IO}_4^-$  (electron transfer, deoxygenation of  $\text{IO}_4^-$ ) proceed by an inner sphere mechanism (Scheme S1c).<sup>1</sup> Alternatively, other mechanisms (free radical pathways/outer-sphere electron transfer) less related to the glycol oxidation process might operate (Scheme S1d).<sup>2</sup>

#### CL Study

The effect of acid base on the CL intensity of  $\text{IO}_4^-$ - $\text{H}_2\text{O}_2$  (Figure S1a) and 1,10-phen enhanced  $\text{IO}_4^-$ - $\text{H}_2\text{O}_2$  (Figure S1b) was the same. On the other hand, the effects of acid base on the order of reagents have different results (Figure S1c,d). Injection of  $\text{IO}_4^-$  to  $\text{H}_2\text{O}_2$ -1,10-phen mixture resulted in high CL signals in neutral as well as in basic mediums. Conversely, the injection of  $\text{H}_2\text{O}_2$  to  $\text{IO}_4^-$ -1,10-phen mixture in neutral medium results in relatively high CL signals but have very poor CL signals in basic medium. The reduction of  $\text{IO}_4^-$  in basic medium was the cause of this low CL signals. The injection of 1,10-phen to  $\text{H}_2\text{O}_2$ - $\text{IO}_4^-$  mixture in neutral and basic mediums have very poor CL signals. This was due to the injection of 1,10-phen after the manifestation of CL reaction.

## MALDI-TOF-MS

In an attempt to validate this mechanistic hypothesis, we carried out MALDI-TOF mass spectrometry to identify the final products of the oxidation. The MALDI-TOF-MS spectrum of the reaction mixture of 1,10-phen with H<sub>2</sub>O<sub>2</sub> and IO<sub>4</sub><sup>-</sup> in neutral medium features two new peaks at m/z 215.06 and 235.04 that belong to H.1,10-phen(OH)<sub>2</sub><sup>+</sup> and Na.1,10-phen(O)<sub>2</sub><sup>+</sup>, respectively (Figure S2).<sup>3</sup>

## CV study

The semi in situ cyclic voltammetry (CV) was performed to investigate the redox process of 1,10-phen. Multiple CV cycles were started and the difference in voltammetric response on addition of reagents was observed (Figure 2d). 1,10-phen itself gives no redox reaction in the given potential window. The addition of H<sub>2</sub>O<sub>2</sub> changes the onset of the current values but no significant change in peak was observed. However, when IO<sub>4</sub><sup>-</sup> was added in the 1,10-phen solution, the significant changes in the redox behavior was observed. The two small reduction peaks at -0.6 and -1 V was observed. These peaks corresponds to the reduction of IO<sub>4</sub><sup>-</sup> (Figure S3) but no oxidation peak were observed in any sample alone. However, upon addition of H<sub>2</sub>O<sub>2</sub> and IO<sub>4</sub><sup>-</sup> in 1,10-phen solution, the higher oxidation current and a clear oxidation peak at 0.6 V was observed. This oxidation peak corresponds to the product formed after addition of IO<sub>4</sub><sup>-</sup> to H<sub>2</sub>O<sub>2</sub> and 1,10-phen. Our proposed mechanism suggests the oxidation of 1,10-phen after mixing the three reagents altogether. Furthermore, the enhancement in oxidation current upon addition of IO<sub>4</sub><sup>-</sup> to H<sub>2</sub>O<sub>2</sub> and 1,10-phen solution as compared to 1,10-phen, 1,10-phen+H<sub>2</sub>O<sub>2</sub> and 1,10phen+IO<sub>4</sub><sup>-</sup> confirms that H<sub>2</sub>O<sub>2</sub> and IO<sub>4</sub><sup>-</sup> promotes the oxidation of 1,10-phen. The voltammetric study provides an additional support to our proposed mechanism of the CL of 1,10-phen (Scheme 2). The CV study of the reagents shows that there was no peak pointing the formation of the oxidized products in individuals reagents (Figure S3) contrast to voltammograms of the IO<sub>4</sub><sup>-</sup> addition with H<sub>2</sub>O<sub>2</sub>-1,10-phen.

## Free Radical Study

5,5-dimethyl-1-pyrroline-N-oxide (DMPO) was utilized to trace the free radicals through EPR.<sup>4</sup> Free radicals in enhanced CL system were also recorded at different time (Figure S6a) and in freeze state (Figure S6b). The EPR spectra at different times show that the free radicals generation increases with time, and after certain time decreases. The EPR spectra in the freeze

state confirms the generation of free radicals in the system but the due to anisotropic effect the peak nature is different (Figure S6).

Subsequent experiments were conducted for the free radicals generated in presence and absence of 1,10-phen by the radical scavengers on the CL intensity (Table S1). Radical scavenger studies suggested that radicals are important in the CL system, and the results support free radical mechanism. The high CL signals in presence of  $\text{NaN}_3$  ( $^1\text{O}_2$  scavenger) pointed that the final emission is from 1,10-phen rather than from  $^1\text{O}_2$ .

### **Effect of different analogues of 1,10-phen**

A broad range of 1,10-phen derivatives, including those bearing high degree of functionality, are tolerated in the reaction. Particularly notable is the reaction tolerance of steric hindrance (2,9-dimethyl, 3,4,7,8-tetramethyl, 4,7-phen, 1,7-phen, 4,7-dihydroxy), common protecting groups (5-nitro, 5,6-dione, 5,6-epoxy-5,6-dihydro, 5,6-dimethyl, 5-amine), aromatic halides (2-chloro) and various analogues (tetradecahydro-4,7-phen, phenanthrene). The oxidation of 1,10-phen derivatives are governed by electronic and steric effects of the attached substituents. The stability of  $\text{IO}_4^-$  complex is subject to electric and steric influences.<sup>5</sup> The insight may provide O-O activation and CL chemistry in general. Similarly, phenanthrene, a tricyclic analogue of 1,10-phen with two C-atoms in place of the two N atoms,<sup>6</sup> also have very low CL signals. The lower CL signals of neocuproine put forward the role of two methyl groups at ortho positions to N-atoms which donate electron density.

### **DFT calculations**

DFT calculations were performed to further support the experimental outcomes. The lowest energy optimized molecules were considered as stable molecules and hence more dominant product. The energy of the optimized reactants, intermediates and the products was calculated. The lowest energy optimized molecules were considered as stable molecules and hence dominant product. The OH groups were substituted at different positions in the 1,10-phen and the most stable configuration was found when the OH group is attached to  $\text{C}^{5\text{th}}$  and  $\text{C}^{6\text{th}}$  positions. Similarly, the OH-substituted 1,10-phen was further treated with  $\text{IO}_4^-$  and the consequent structures were optimized. The results support that the  $\text{C}^{5\text{th}}$  and  $\text{C}^{6\text{th}}$  gives the most stable product. The HOMO and LUMO of 1,10-phen derivatives was found (Figure S7). The figure shows that the HOMO and LUMO of compound i-v are not able to give the reaction that why there were no CL signals in

presence of these compounds. The methyl group present in compound vii cover the HOMO and LUMO, thus have low probability of CL reaction and consequently, low CL signal. The rest of the compounds (viii-xiv) have exposed HOMO and LUMO which is available for CL reaction and also resulted in high CL signals.

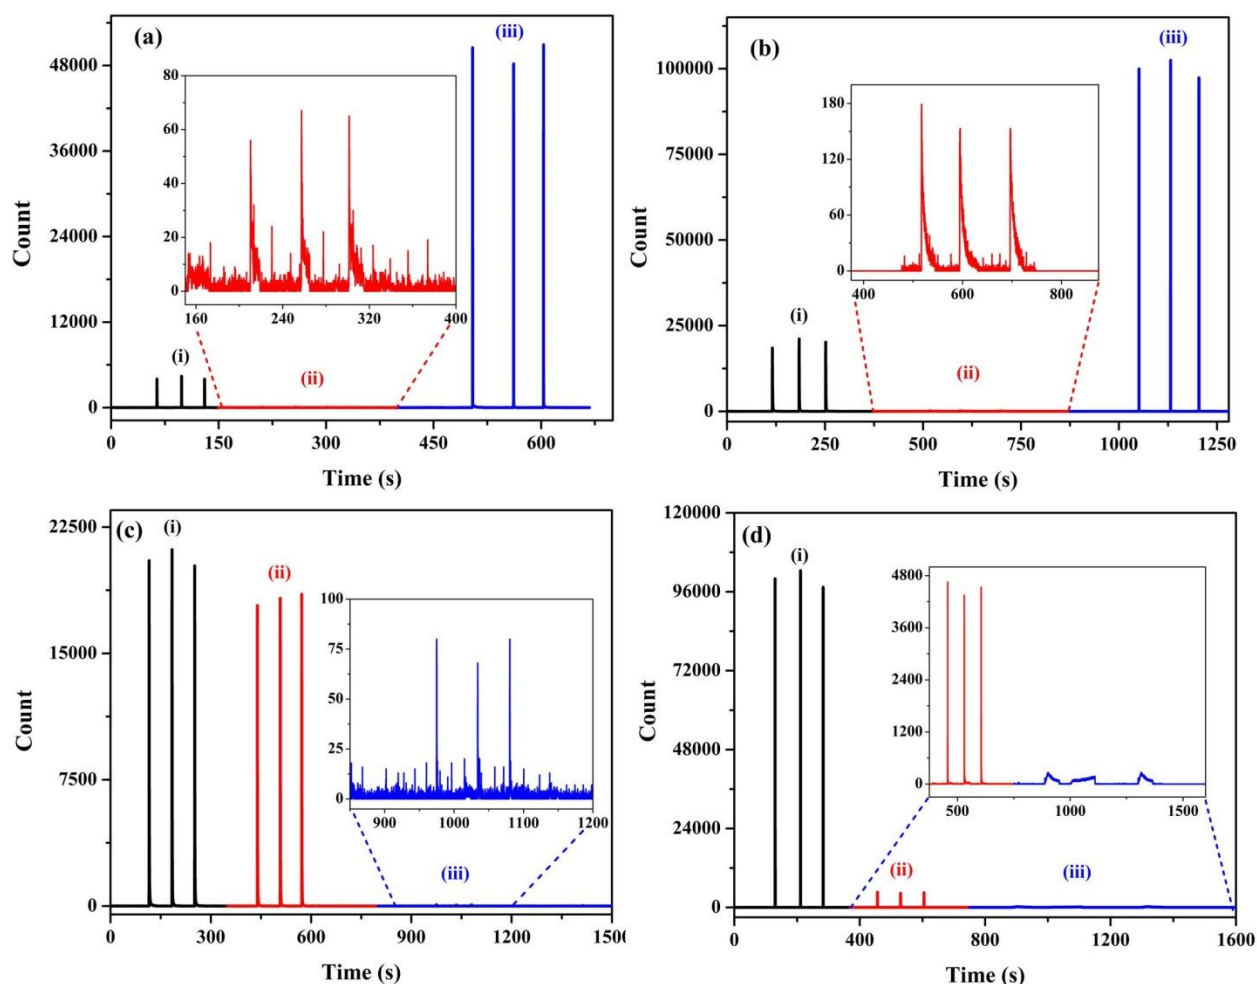

**Figure S1.** (a) Effect of acid base on CL intensity of  $\text{IO}_4^-$ - $\text{H}_2\text{O}_2$  system (i)  $\text{IO}_4^-$  injected to  $\text{H}_2\text{O}_2$  (ii)  $\text{IO}_4^-$  injected to  $\text{H}_2\text{O}_2+\text{HCl}$  (iii)  $\text{IO}_4^-$  injected to  $\text{H}_2\text{O}_2+\text{NaOH}$ . (b) Effect of acid base on CL intensity of 1,10-phen enhanced  $\text{IO}_4^-$ - $\text{H}_2\text{O}_2$  system. (i)  $\text{IO}_4^-$  injected to  $\text{H}_2\text{O}_2+1,10\text{-phen}$  (ii)  $\text{IO}_4^-$  injected to  $\text{H}_2\text{O}_2+1,10\text{-phen}+\text{HCl}$  (iii)  $\text{IO}_4^-$  injected to  $\text{H}_2\text{O}_2+1,10\text{-phen}+\text{NaOH}$ . (c) Effect of order of addition of reagents on the CL intensity of 1,10-phen enhanced  $\text{IO}_4^-$ - $\text{H}_2\text{O}_2$  system. (i)  $\text{IO}_4^-$  injected to  $\text{H}_2\text{O}_2+1,10\text{-phen}$  (ii)  $\text{H}_2\text{O}_2$  injected to  $\text{IO}_4^-+1,10\text{-phen}$  (iii) 1,10-phen injected to  $\text{H}_2\text{O}_2+\text{IO}_4^-$ . (d) Effect of order of addition of reagents in basic medium on CL intensity of the system. (i)  $\text{IO}_4^-$  injected to  $\text{H}_2\text{O}_2+1,10\text{-phen}+\text{NaOH}$  (ii)  $\text{H}_2\text{O}_2$  injected to  $\text{IO}_4^-+1,10\text{-phen}+\text{NaOH}$  (iii) 1,10-phen injected to  $\text{H}_2\text{O}_2+\text{IO}_4^-+\text{NaOH}$ . The concentration of  $\text{IO}_4^-$  was 0.01 M, 1,10-phen was 0.005 M while  $\text{H}_2\text{O}_2$ , HCl and NaOH were 0.1 M. The volume of each reagent was 50  $\mu\text{L}$ .

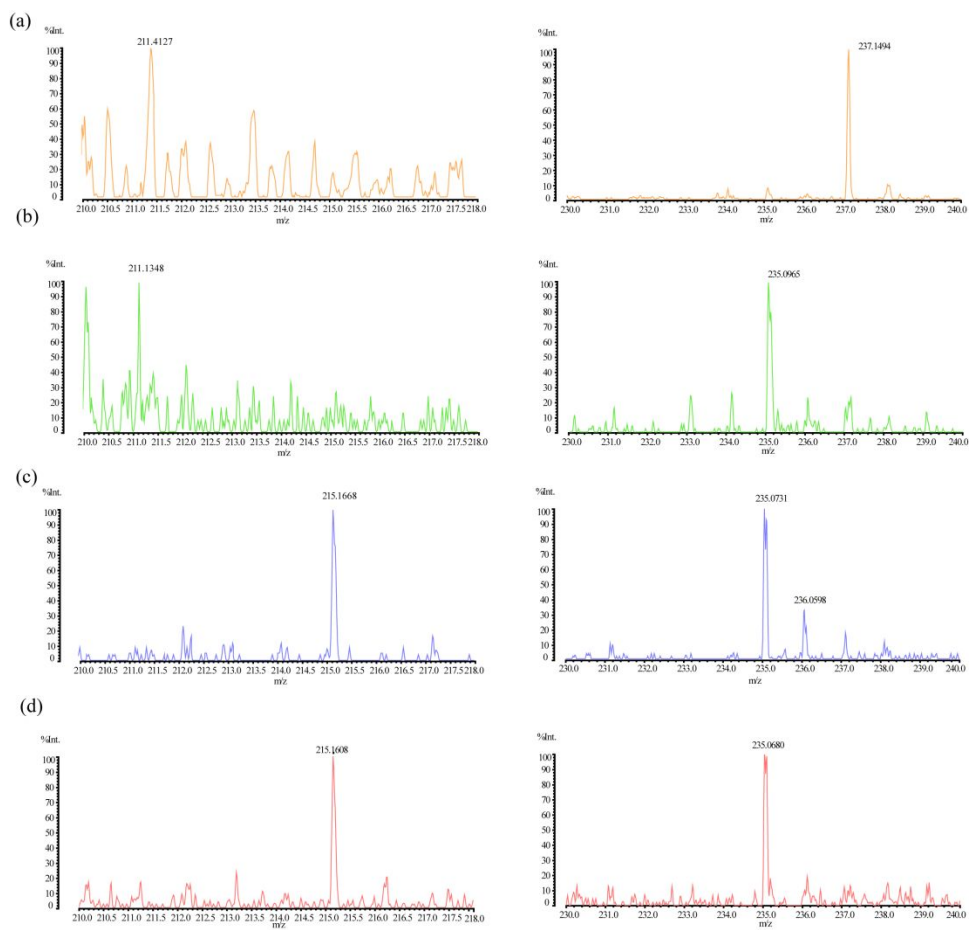

**Figure S2.** MALDI-TOF MS analysis of the different combination of CL system. Mass spectrum of (a) 1,10-phen (b) 1,10-phen+H<sub>2</sub>O<sub>2</sub> (c) 1,10-phen+NaIO<sub>4</sub> (d) 1,10-phen+ H<sub>2</sub>O<sub>2</sub>+NaIO<sub>4</sub>.

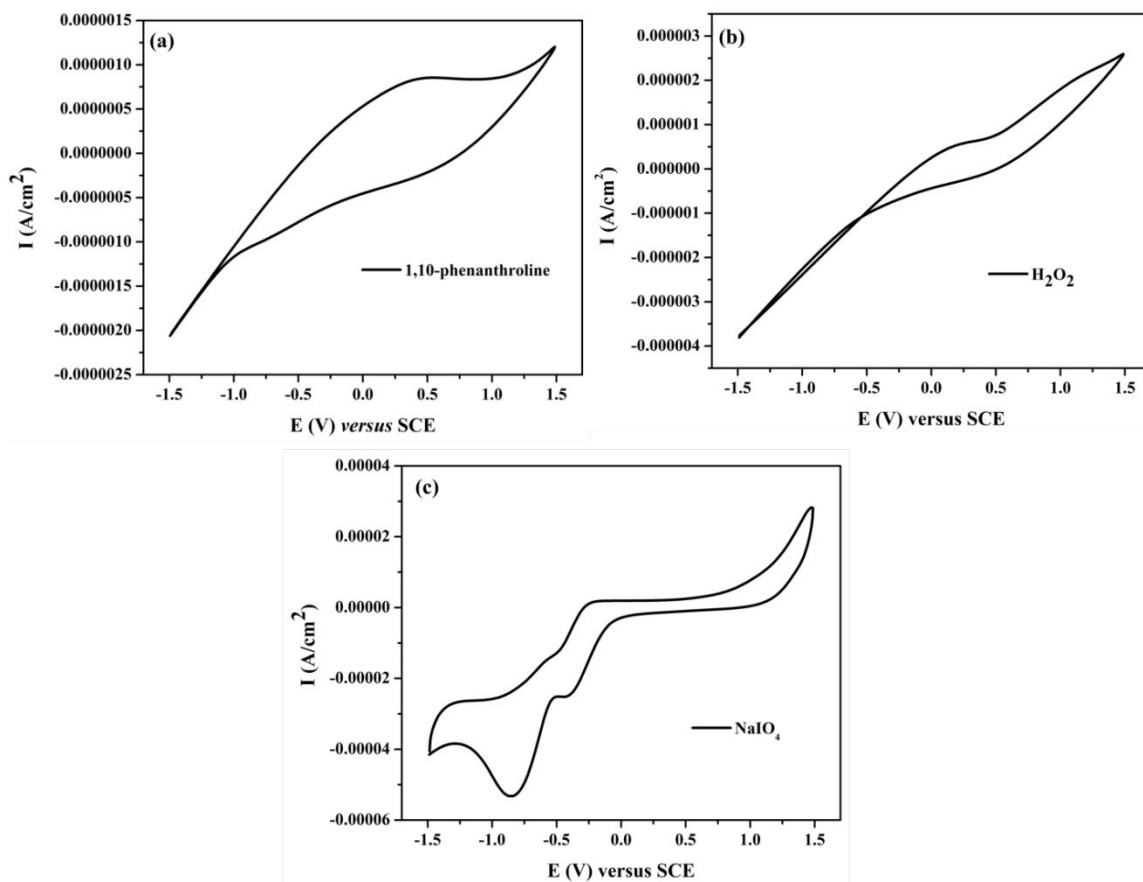

**Figure S3.** Cyclic voltammetry of (a) 1,10-phen (b)  $H_2O_2$  (c)  $IO_4^-$ .

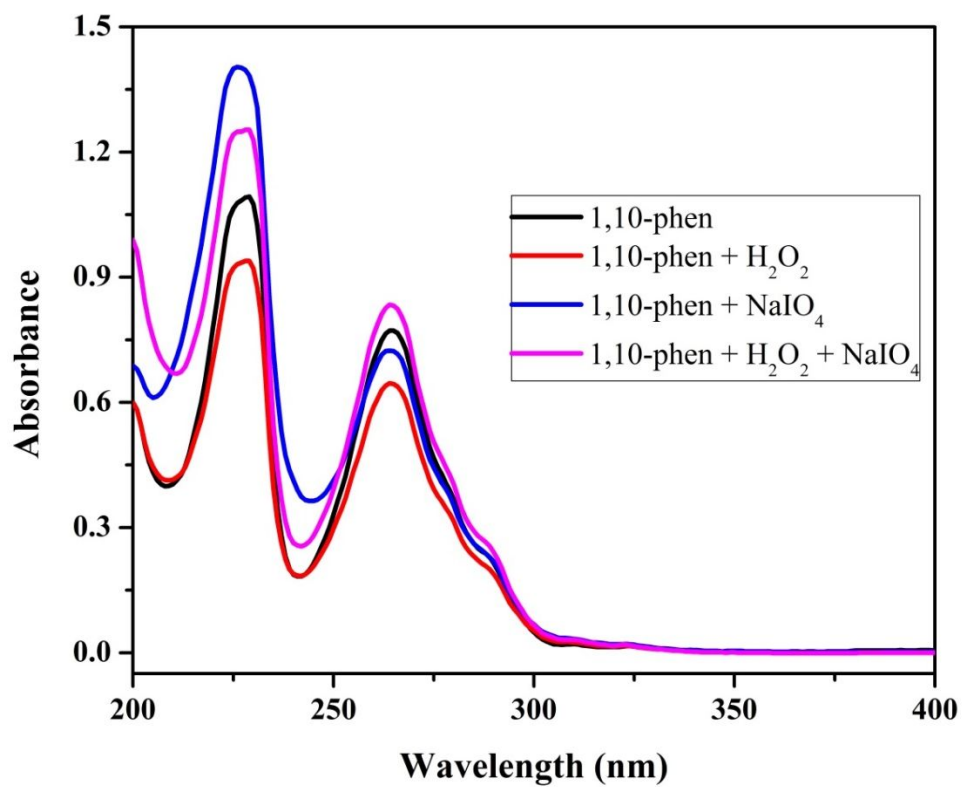

**Figure S4.** UV-visible spectroscopy of phenanthroline enhanced NaIO<sub>4</sub>-H<sub>2</sub>O<sub>2</sub> system in different combinations of the reaction mixture.



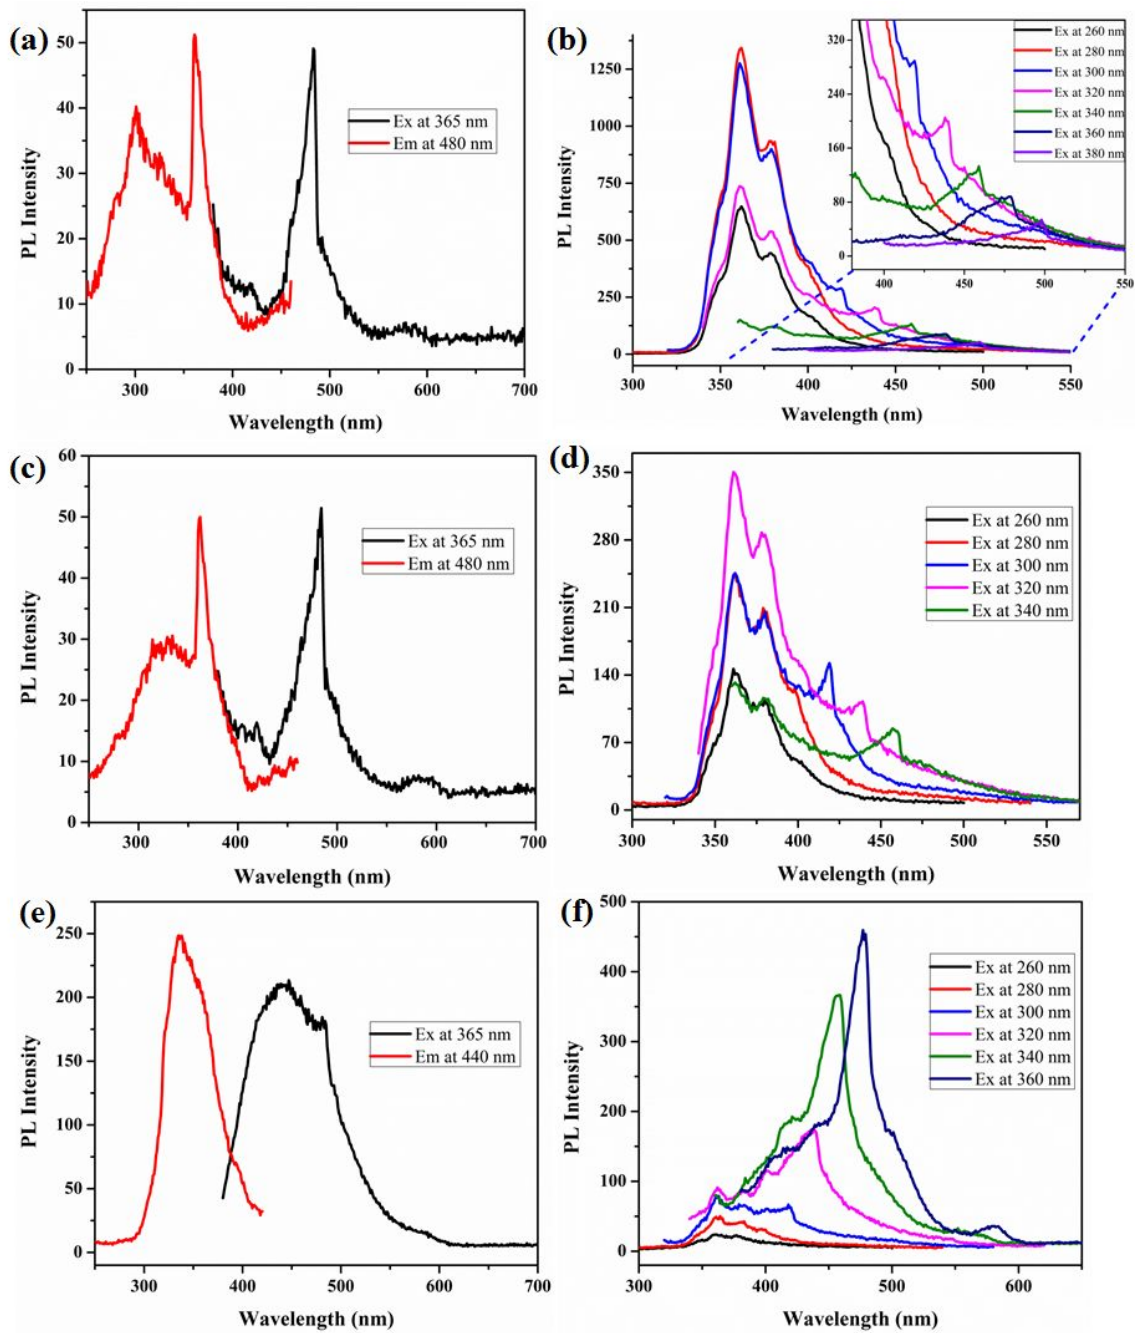

**Figure S5.** (a, b) PL spectra of 1,10-phen+H<sub>2</sub>O<sub>2</sub>. (c, d) PL spectra of 1,10-phen+NaIO<sub>4</sub>. (e, f) PL spectra of 1,10-phen+NaIO<sub>4</sub>+H<sub>2</sub>O<sub>2</sub>.

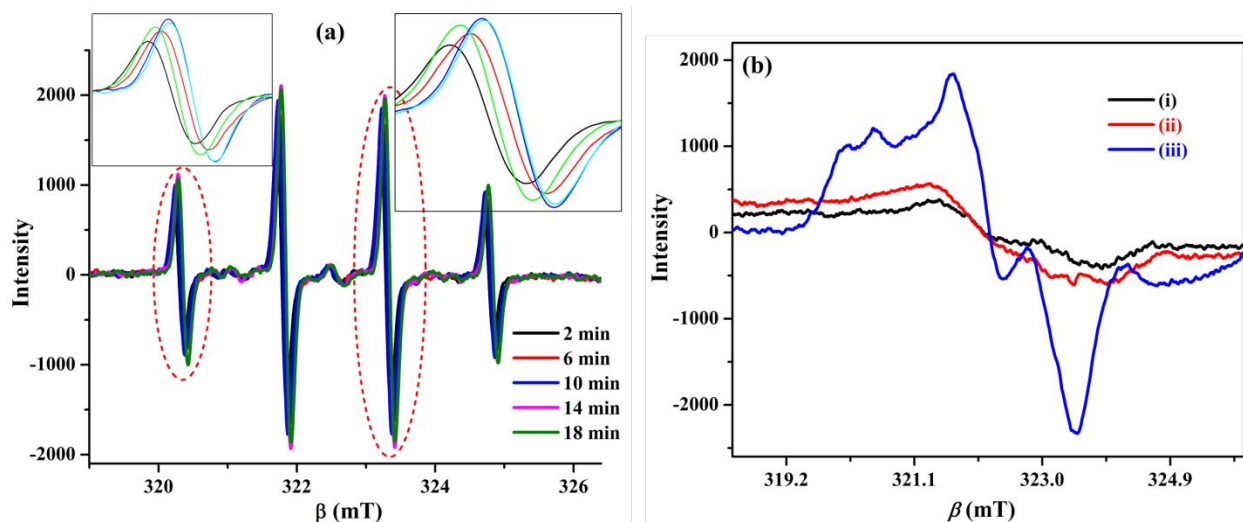

**Figure S6.** Free radical trapping study using EPR spectroscopy. DMPO/ $\cdot$ OH adducts of  $\text{IO}_4^-$ - $\text{H}_2\text{O}_2$  system in presence of 1,10-phen. **(a)** Spectra of  $\text{IO}_4^-$ - $\text{H}_2\text{O}_2$ -1,10-phen at different times. **(b)** EPR spectra of  $\text{IO}_4^-$ - $\text{H}_2\text{O}_2$ -1,10-phen in freeze state (i) -100 °C (ii) -150 °C (iii) -150 °C without sample tube. Conditions: In all experiments, the concentration of  $\text{IO}_4^-$  was 0.01 M, 1,10-phen was 0.005 M,  $\text{H}_2\text{O}_2$ , NaOH and DMPO were 0.1 M.

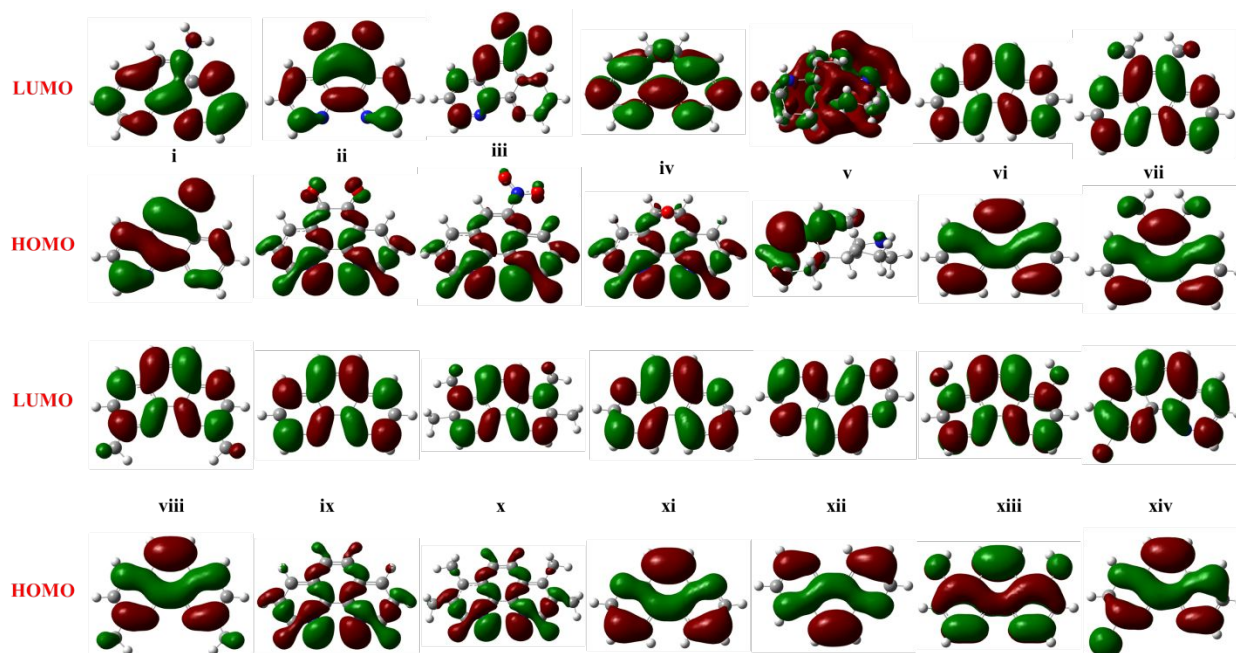

**Figure S7.** HOMO and LUMO of 1,10-phen derivatives.

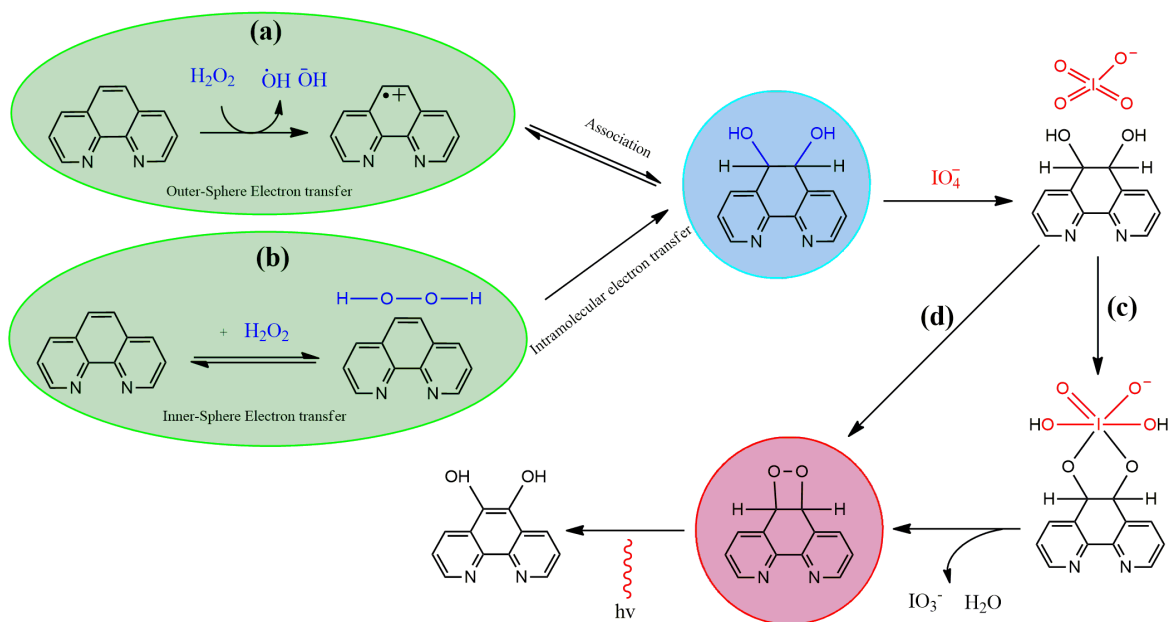

**Scheme S1.** Proposed pathways for the enhancement of periodate-peroxide CL system in presence of 1,10-phen. Pathway (a) was the most probable way for the insertion of  $\text{H}_2\text{O}_2$  with 1,10-phen compared to the concerted path (b). The reduction of  $\text{IO}_4^-$  most probably take place following outer-sphere mechanism (c), and the chances of pathway (d) was very low.

**Table S1.** Effect of free radicals scavengers on the CL intensity of  $\text{IO}_4^-$ - $\text{H}_2\text{O}_2$  in the presence of 1,10-phenanthroline.

| Free radical scavengers | Radicals            | Concentration (M) | $\text{NaIO}_4$ - $\text{H}_2\text{O}_2$ -1,10-phen (% decrease) | $\text{NaIO}_4$ - $\text{H}_2\text{O}_2$ -1,10-phen-NaOH (% decrease) |
|-------------------------|---------------------|-------------------|------------------------------------------------------------------|-----------------------------------------------------------------------|
| -                       | -                   | -                 | 32,000                                                           | 300,000                                                               |
| Water                   | -                   | -                 | 19,700 (38)                                                      | 200,000 (33)                                                          |
| $\text{NaN}_3$          | $^1\text{O}_2$      | 0.1               | 72,170 (-125)↑                                                   | 232,000 (23)                                                          |
| Ascorbic acid           | $\cdot\text{OH}$    | 0.1               | 00 (100)                                                         | 00 (100)                                                              |
| NBT                     | $\cdot\text{O}_2^-$ | 0.01              | 2293 (93)                                                        | 140,000 (53)                                                          |
| DMPO                    | $\cdot\text{O}_2^-$ | 0.1               | 200 (99)                                                         | 117,500 (61)                                                          |
| Thiourea                | $\cdot\text{OH}$    | 0.1               | 00 (100)                                                         | 29,400 (90)                                                           |

Each result is an average of triplicate readings. The concentration of  $\text{NaN}_3$ , ascorbic acid, DMPO, thiourea and  $\text{H}_2\text{O}_2$  was 0.1 M. NBT and  $\text{NaIO}_4$  was 0.01 M. 1,10-phen was 0.005 M. The volume of each reagent used was 50  $\mu\text{L}$ .

**Table S2** Effect of different derivatives of 1,10-phen on the CL intensity of  $\text{IO}_4^-$ - $\text{H}_2\text{O}_2$  system in different pH.

| S. No. | Reagents                          | $\text{NaIO}_4$ - $\text{H}_2\text{O}_2$<br>(% effect) | $\text{NaIO}_4$ - $\text{H}_2\text{O}_2$ -HCl<br>(% effect) | $\text{NaIO}_4$ - $\text{H}_2\text{O}_2$ -NaOH<br>(% effect) |
|--------|-----------------------------------|--------------------------------------------------------|-------------------------------------------------------------|--------------------------------------------------------------|
| -      | -                                 | 600                                                    | 40                                                          | 1500                                                         |
| 1      | 1,10-phen-5-amine                 | 30 (95)↓                                               | 20                                                          | 50                                                           |
| 2      | 1,10-phen-5,6-dione               | 70 (88) ↓                                              | 30                                                          | 300                                                          |
| 3      | 5-nitro-1,10-phen                 | 165 (72) ↓                                             | 60                                                          | 1460                                                         |
| 4      | 5,6-epoxy-1,10-phen               | 181 (70) ↓                                             | 105                                                         | 51000                                                        |
| 5      | Tetradecahydro-4,7-phenanthroline | 783 (30)↑                                              | 355                                                         | 440                                                          |
| 6      | Phenanthrene                      | 1215 (102)↑                                            | 80                                                          | 475                                                          |
| 7      | 5,6-dimethyl-1,10-phen            | 3736 (522)↑                                            | 90                                                          | 2070                                                         |
| 8      | 2,9-dimethyl-1,10-phen            | 10300 (1616)↑                                          | 400                                                         | 2444                                                         |
| 9      | 1,10-phen                         | 15000 (2400)↑                                          | 170                                                         | 99300                                                        |
| 10     | 3,4,7,8-tetramethyl-1,10-phen     | 19400 (3133)↑                                          | 850                                                         | 101300                                                       |
| 11     | 4,7-phen                          | 32200 (5266)↑                                          | 47660                                                       | 63300                                                        |
| 12     | 1,7-phen                          | 49900 (8216)↑                                          | 1740                                                        | 1070                                                         |
| 13     | 4,7-dihydroxy-1,10-phen           | 93900 (15550)↑                                         | 105                                                         | 2735                                                         |
| 14     | 2-chloro-1,10-phen                | 288556 (47991)↑                                        | 350                                                         | 27900                                                        |

Each result is an average of triplicate readings. The concentration of  $\text{H}_2\text{O}_2$ , HCl and NaOH was 0.1 M.  $\text{NaIO}_4$  was 0.01 M while 1,10-phen and its derivatives were 0.005 M. The volume of each reagent used was 50  $\mu\text{L}$ . The upward arrow shows the increase compare to original reaction, while the downward arrow shows the decrease.

**Table S3** Theoretical parameters obtained from DFT calculations

| Name | HOMO     | LUMO     | I.E     | E.A      | E.N                 |
|------|----------|----------|---------|----------|---------------------|
| 1    | -0.19644 | -0.04546 | 0.19644 | 0.04546  | $-3.24 \times 10^3$ |
| 2    | -0.25693 | -0.13375 | 0.25693 | 0.13375  | $-3.64 \times 10^3$ |
| 3    | -0.24939 | -0.12063 | 0.24939 | 0.12063  | $-4.00 \times 10^3$ |
| 4    | -0.23754 | -0.06202 | 0.23754 | 0.06202  | $-3.31 \times 10^3$ |
| 5    | -0.18731 | 0.07770  | 0.18731 | -0.07770 | $-3.33 \times 10^3$ |
| 6    | -0.21204 | -0.03654 | 0.21204 | 0.03654  | $-2.79 \times 10^3$ |
| 7    | -0.22484 | -0.04973 | 0.22484 | 0.04973  | $-3.52 \times 10^3$ |
| 8    | -0.22366 | -0.04653 | 0.22366 | 0.04653  | $-3.48 \times 10^3$ |
| 9    | -0.23141 | -0.05499 | 0.23141 | 0.05499  | $-2.89 \times 10^3$ |
| 10   | -0.22077 | -0.04989 | 0.22077 | 0.04989  | $-4.13 \times 10^3$ |
| 11   | -0.23815 | -0.06020 | 0.23815 | 0.06020  | $-2.88 \times 10^3$ |
| 12   | -0.23750 | -0.05638 | 0.23750 | 0.05638  | $-2.89 \times 10^3$ |
| 13   | -0.22977 | -0.05953 | 0.22977 | 0.05953  | $-3.69 \times 10^3$ |
| 14   | -0.24263 | -0.06534 | 0.24263 | 0.06534  | $-4.34 \times 10^3$ |

## References

1. Ayoko, G. A.; Iyun, J. F.; El-Idris, I. F., Electron transfer at tetrahedral cobalt (II), part III: kinetics of copper (II) ion catalysed reduction of periodate. *Transition Metal Chemistry* **1992**, *17* (5), 423-425.
2. Kaiser, E.; Weidman, S., The mechanism of the periodate oxidation of aromatic systems. I. A kinetic study of the periodate oxidation of hydroquinone and p-methoxyphenol in acidic solution. *Journal of the American Chemical Society* **1964**, *86* (20), 4354-4358.
3. Bellér, G.; Szabó, M.; Lente, G.; Fábrián, I., Formation of 1, 10-phenanthroline-N, N' -dioxide under mild conditions: the kinetics and mechanism of the oxidation of 1, 10-phenanthroline by peroxomonosulfate ion (oxone). *The Journal of organic chemistry* **2016**, *81* (13), 5345-5353.
4. Krylova, G.; Dimitrijevic, N. M.; Talapin, D. V.; Guest, J. R.; Borchert, H.; Lobo, A.; Rajh, T.; Shevchenko, E. V., Probing the surface of transition-metal nanocrystals by chemiluminescence. *Journal of the American Chemical Society* **2010**, *132* (26), 9102-9110.
5. Sklarz, B., Organic chemistry of periodates. *Quarterly Reviews, Chemical Society* **1967**, *21* (1), 3-28.
6. McCann, M.; Kellett, A.; Kavanagh, K.; Devereux, M.; LS Santos, A., Deciphering the antimicrobial activity of phenanthroline chelators. *Current medicinal chemistry* **2012**, *19* (17), 2703-2714.
